# Supplementary material for: Evaluation of Mortality Prediction Scales in Extracapsular Hip Fractures: A Retrospective Case-Control Study
Source: Research Square preprint supplement (doi:10.21203/rs.3.rs-6659039/v1), 2025-05-23
Supplement: Supplementary file 1 [file e34816acbc7bd1ff44179c79.xlsx]

## Sheet: Hoja1
Inclusion Nº	Gender	Age	Type Fracture	Side	Barthel	Barthel<60	Charlson	Charlson>5	Dementia	Heart	Lung	Renal	Neurologic	* >80a	* Tto_anticoag	Weight	Tall	IMC	BMI>25	* DM	Lymphopenia	Antiplat/ACO	ASA	ASA>2	Delay	QX<48h	Postop stay	Total stay	Device	Open Reduction	Surgery>150min	ICU	Pre-Surg Trasf	Post-Surg Trasf	Medical Complic	Type	Surgical Wound complic	Type	Surgical over Surgical	Why	30-90 day readmision	RA_Med	RA_Qx	Exitus_30d	Group Death<12m	cause of death	Mb_POSSUM	Mt_POSSUM	NHFS_Mort30d
1	1	91	P	D	90	0	6	1	0	1	0	0	0	1	0	55	1.5	24.4444	0	0	0	1	3	1	3	0	18	21	Nail	0	0	0	0	0	1	atrial fibrillation	1	surgical wound infection	1	surgical wound lavage	0	0	0	0	0		57.4	12.9	4.4
2	0	92	S	D	60	1	9	1	1	0	0	0	1	1	0	60	1.68	21.2585	0	0	1	0	3	1	12	1	8	20	DHS	0	0	0	0	0	1	Renal failure	0		0		1	1	0	0	1	respiratory failure	73.9	9.01	11
3	1	89	S	D	100	0	5	1	0	1	0	0	0	1	0	75	1.58	30.0433	1	0	0	0	2	0	6	0	7	13	Nail	1	0	0	0	0	1	intervened limb oedema	0		0		0	0	0	0	0		63.6	15.3	4.4
4	1	72	P	I	90	0	8	1	0	1	0	0	0	0	0	72	1.6	28.125	1	1	1	0	4	1	2	1	20	22	Nail	0	0	0	0	1	1	Hepatic decompensation	1	Wounded spotting	1	surgical wound lavage	1	1	0	1	1	septic shock	44	8.63	4.4
5	1	81	P	I	100	0	5	1	0	1	0	0	0	1	0	69	1.55	28.7201	1	0	0	0	3	1	2	1	4	6	Nail	1	0	0	0	0	0		0		0		0	0	0	0	0		29.3	5.32	2.7
6	0	81	P	D	50	1	5	1	1	1	0	0	0	1	0	55	1.7	19.0311	0	0	1	0	3	1	2	1	5	7	DHS	1	0	0	0	0	0		0		0		0	0	0	0	1	Diarrhea	29.3	5.32	6.9
7	1	83	P	D	90	0	9	1	0	1	0	1	1	1	0	65	1.55	27.0552	1	1	1	1	4	1	6	0	8	14	Nail	0	0	0	0	0	0		0		1	Cut out	1	0	1	0	1	Respiratory and renal failure	98.1	73.5	6.9
8	1	86	P	I	85	0	6	1	1	0	0	0	1	1	0	58	1.55	24.1415	0	0	0	0	2	0	3	0	4	7	DHS	1	0	0	0	0	0		0		0		0	0	0	0	0		36.4	6.79	11
9	1	79	P	D	100	0	4	0	1	1	0	0	0	0	0	80	1.5	35.5556	1	0	1	0	3	1	8	1	6	14	Nail	0	0	0	0	0	1	atrial fibrillation	0		0		1	1	0	0	1	Renal failure	73.9	21.1	4.4
10	0	85	P	I	95	0	5	1	0	1	0	0	0	1	1	75	1.6	29.2969	1	0	1	1	3	1	4	0	4	8	Nail	0	0	0	0	0	1	Constipacion	0		0		0	0	0	0	0		91.1	43	6.9
11	0	75	S	I	100	0	5	1	0	1	0	0	1	0	1	70	1.7	24.2215	0	0	1	1	3	1	3	0	4	7	Nail	0	0	0	0	0	0		0		0		0	0	0	0	0		49.15	10.5	6.9
12	1	82	P	D	100	0	7	1	0	1	0	0	0	1	0	56	1.65	20.5693	0	1	0	0	2	0	4	0	4	8	DHS	1	0	0	1	1	0		0		0		0	0	0	0	0		56	12.2	6.9
13	0	82	P	I	60	1	6	1	0	1	0	0	1	1	0	80	1.7	27.6817	1	0	1	1	3	1	2	1	4	6	Nail	1	0	0	0	0	0		0		0		0	0	0	0	0		88.1	36.8	6.9
14	1	82	P	D	60	1	6	1	1	1	0	0	1	1	1	60	1.6	23.4375	0	1	1	1	3	1	2	0	6	8	Nail	0	0	0	1	0	0		0		0		0	0	0	0	1	Renal failure	91.1	27.7	11
15	1	82	P	I	60	1	7	1	0	1	0	0	0	1	1	60	1.6	23.4375	0	1	1	1	3	1	2	0	6	8	Nail	0	0	0	0	0	1		0		0		0	0	0	0	1	cardiorespiratory arrest	89.7	24.5	6.9
16	1	78	P	D	90	0	8	1	0	1	0	1	1	0	0	75	1.55	31.2175	1	0	1	1	3	1	4	0	4	8	DHS	0	0	0	0	0	0		0		0		0	0	0	0	0		86.3	33.8	6.9
17	1	89	P	I	60	1	5	1	0	1	0	0	0	1	0	62	1.65	22.7732	0	0	1	0	1	0	1	1	4	5	Nail	0	0	0	0	0	0		0		0		0	0	0	0	0		63.6	15.3	4.4
18	1	79	P	I	70	0	5	1	1	0	0	0	0	0	0	78	1.5	34.6667	1	0	0	0	4	1	7	1	5	12	Nail	0	0	0	1	1	0		0		0		1	1	0	0	1	respiratory failure	52	21.59	11
19	1	90	P	I	100	0	8	1	0	1	0	1	0	1	0	80	1.52	34.626	1	0	1	0	2	0	2	1	4	6	Nail	0	0	0	0	0	0		0		0		0	0	0	0	0		73.9	21.1	4.4
20	1	76	P	I	20	1	5	1	0	1	1	0	0	0	1	100	1.6	39.0625	1	0	1	1	3	1	2	0	4	6	Nail	0	0	0	0	1	0		0		0		0	0	0	0	1	congestive heart failure	86.3	33.8	6.9
21	1	85	P	D	90	0	13	1	1	1	1	0	1	1	1	82	1.65	30.1194	1	1	1	1	3	1	2	0	4	6	Nail	0	0	0	0	0	0		0		0		0	0	0	0	1	cardiorespiratory arrest	70.7	19	11
22	1	83	P	I	70	0	8	1	0	1	0	1	0	1	0	70	1.5	31.1111	1	1	1	0	2	0	6	0	7	13	Nail	0	0	0	0	0	1	Ventricular auriculo blocking (Pacemaker)	0		0		0	0	0	0	0		67.3	17.1	4.4
23	1	90	P	I	80	0	8	1	1	1	0	1	0	1	0	52	1.6	20.3125	0	0	1	0	2	0	4	1	2	6	PHP	0	0	0	1	1	1	atrial fibrillation	1	Wounded spotting	1	dislocation of partial hip prosthesis	1	0	1	0	1	Pneumonia	70.7	19	11
24	1	90	P	D	80	0	9	1	0	1	0	1	0	1	0	52	1.6	20.3125	0	0	1	0	2	0	4	0	5	9	PHP	0	0	0	1	0	1	atrial fibrillation, bradicardia	1	Wounded spotting	1	dislocation of partial hip prosthesis	1	0	1	0	0		71.9	19.9	6.9
25	1	86	S	I	70	0	6	1	1	1	0	0	0	1	0	50	1.6	19.5312	0	0	1	1	2	0	3	1	5	8	Nail	1	0	0	1	0	1	Renal failure and delirium	0		0		0	0	0	0	1	cardiorespiratory arrest	61.3	14.4	11
26	0	92	P	I	100	0	8	1	0	1	0	0	0	1	0	65	1.65	23.8751	0	0	1	0	4	1	5	0	5	10	Nail	0	0	1	0	0	0		0		0		0	0	0	0	0		91.1	43	16
27	1	86	P	I	90	0	5	1	0	0	0	0	0	1	0	65	1.65	23.8751	0	0	1	0	2	0	4	0	7	11	Nail	0	0	0	1	0	0	atrial fibrillation	0		0		0	0	0	0	0		48	9.71	4.4
28	1	92	P	I	60	1	7	1	1	1	0	0	1	1	0	55	1.48	25.1096	1	0	0	0	2	0	2	1	4	6	Nail	0	0	0	0	0	0		0		0		0	0	0	0	0		45.5	9.11	11
29	1	85	P	I	95	0	6	1	0	1	0	0	1	1	1	60	1.63	22.5827	0	1	1	0	2	0	3	1	3	6	Nail	0	0	0	1	0	0		0		0		0	0	0	0	1	cardiorespiratory arrest	82.1	28.3	6.9
30	1	81	P	D	100	0	7	1	0	1	0	0	1	0	0	70	1.49	31.5301	1	0	1	1	3	1	1	1	7	8	Nail	0	0	0	0	0	1	renal failure	0		0		0	0	0	0	0		76.9	23.3	4.4
31	1	92	P	I	80	0	9	1	1	1	0	0	1	1	0	59	1.42	29.2601	1	0	0	1	3	1	4	0	6	10	Nail	0	0	0	0	1	0		0		0		0	0	0	0	0		49.5	10.2	11
32	1	92	P	D	80	0	9	1	1	1	0	0	1	1	0	59	1.42	29.2601	1	0	0	1	3	1	4	0	6	10	Nail	0	0	0	0	1	0		0		0		0	0	0	0	0		49.5	10.2	11
33	1	79	S	I	75	0	7	1	0	1	0	0	0	0	1	73	1.6	28.5156	1	0	0	1	4	1	4	0	5	9	Nail	0	0	1	1	1	1	pneumonia	0		0		0	1	0	0	0		82.9	29.5	6
34	1	83	P	D	70	0	8	1	0	1	1	0	0	1	1	90	1.65	33.0579	1	1	1	1	4	1	8	0	5	13	Nail	0	0	0	0	0	1	respiratory infection	0		0		1	1	0	0	0		44	8.63	4.4
35	0	90	P	D	100	0	10	1	0	1	1	1	1	1	0	77	1.6	30.0781	1	0	0	1	3	1	8	1	6	14	Nail	0	0	0	0	1	1	paralytic ileus	0		0		0	0	0	0	1	Renal failure	86.3	33.8	11
36	1	88	P	I	80	0	6	1	0	1	0	1	0	1	0	70	1.69	24.5089	0	0	1	0	3	1	1	1	4	5	Nail	0	0	0	0	0	0		0		0		0	0	0	0	0		36.4	6.79	6.9
37	1	95	P	I	100	0	9	1	0	1	1	0	0	1	1	50	1.5	22.2222	0	0	0	0	3	1	6	1	5	11	Nail	0	0	0	0	0	0		0		0		0	0	0	0	1	pneumonía and stroke	67.3	17.1	6.9
38	0	88	P	D	60	1	12	1	0	1	1	0	1	1	1	68	1.67	24.3824	0	0	0	0	4	1	6	1	5	11	DHS	0	0	1	1	0	1	hypotension requiring ICU	0		0		0	0	0	0	1	Respiratory septic shock	92.3	46.3	16
39	1	88	P	I	100	0	8	1	1	1	1	0	0	1	1	57	1.6	22.2656	0	0	0	0	3	1	5	1	4	9	Nail	0	0	0	1	1	0		1	Wounded spotting	0		0	0	0	0	1	oral neoplasia	77.9	24.4	24
40	0	88	P	I	60	1	6	1	0	1	0	0	0	1	0	80	1.55	33.2986	1	1	1	0	3	1	3	0	6	9	Nail	0	0	0	0	0	0		0		0		0	0	0	0	0		44	8.63	11
41	0	92	P	D	90	0	7	1	0	1	0	0	1	1	1	60	1.63	22.5827	0	0	0	1	3	1	2	1	4	6	Nail	0	0	0	0	0	0		0		0		0	0	0	0	0		52	10.9	11
42	0	83	P	I	80	0	6	1	0	1	0	0	1	1	1	70	1.64	26.0262	1	0	0	1	3	1	5	0	4	9	Nail	0	0	0	0	0	0		0		0		0	0	0	0	0		29.3	5.32	6.9
43	1	87	P	D	75	0	5	1	1	0	0	0	0	1	0	64	1.8	19.7531	0	0	1	0	3	1	2	0	5	7	Nail	0	0	0	0	0	0		0		0		0	0	0	0	1	Traumatic head injury	52	54.2	6.9
44	1	71	P	D	100	0	4	0	0	1	0	0	0	0	0	60	1.5	26.6667	1	0	1	0	2	0	2	1	4	6	Nail	0	0	0	0	0	0		0		0		0	0	0	0	0		48	9.71	6.9
45	1	90	P	D	60	1	5	1	1	1	0	0	0	1	0	60	1.45	28.5375	1	0	1	0	2	0	4	1	5	9	Nail	0	0	0	0	1	0		0		0		0	0	0	0	1	cardiorespiratory arrest	52	10.9	6.9
46	0	85	P	D	80	0	10	1	0	1	1	1	1	1	1	58	1.74	19.1571	0	0	1	0	3	1	2	0	5	7	Nail	0	0	0	0	0	1	bladder balloon	0		0		1	1	0	1	1	aortic dissection	91.1	43	11
47	1	79	S	D	90	0	9	1	1	0	0	0	1	0	0	75	1.65	27.5482	1	1	1	1	3	1	1	0	6	7	Nail	1	0	0	0	1	0		0		0		1	1	0	0	1	acute pulmonary oedema	61.3	14.4	11
48	1	88	P	I	70	0	6	1	0	1	0	0	0	1	1	70	1.6	27.3437	1	0	1	1	3	1	3	0	5	8	Nail	0	0	1	0	0	1	respiratory depression requiring ICU	0		0		0	0	0	0	0		79.6	25.27	6.9
49	1	87	P	I	100	0	6	1	1	1	1	0	0	1	1	80	1.7	27.6817	1	0	0	0	3	1	3	1	5	8	Nail	1	0	0	0	1	0		1	Wounded spotting	0		0	0	0	0	1	Respiratory sepsis	76.9	23.3	11
50	1	79	P	D	100	0	4	0	0	1	0	0	0	0	0	74	1.58	29.6427	1	0	0	0	2	0	3	0	2	5	DHS	1	0	0	0	0	0		0		0		0	0	0	0	0		40.1	7.66	2.7
51	1	94	P	I	60	1	9	1	0	1	0	1	0	0	0	60	1.55	24.974	0	0	1	0	3	1	2	1	2	4	Nail	0	0	0	0	0	1	atrial fibrillation	0		0		0	0	0	0	0		70.7	19	6.9
52	0	72	P	I	90	0	7	1	1	1	1	0	1	0	0	72	1.72	24.3375	0	0	1	0	3	1	2	0	4	6	Nail	0	0	0	0	0	0		0		0		0	0	0	0	1	Stoke	88.1	36.8	11
53	0	81	P	I	85	0	8	1	1	1	0	1	0	1	1	70	1.57	28.3987	1	1	1	0	2	0	13	1	4	17	Nail	0	0	0	0	0	1	paralytic ileus, renal failure	0		0		1	1	0	0	1	Renal failure	63.3	15.3	11
54	1	86	P	D	25	1	8	1	0	1	0	0	1	1	1	74	1.59	29.271	1	0	1	1	3	1	5	0	4	9	Nail	0	0	0	0	0	1	Anemia, Delirium	0		0		1	1	0	0	0		79.6	25.7	6.9
55	1	86	P	I	75	0	6	1	1	1	0	0	1	1	0	54	1.46	25.3331	1	1	1	0	3	1	3	1	4	7	Nail	0	0	1	0	0	0		0		0		1	1	0	0	1	Alzheimer's progression	48	9.71	11
56	0	75	P	D	90	0	9	1	1	1	0	0	1	0	1	80	1.75	26.1224	1	1	1	0	3	1	3	1	12	15	Nail	0	0	1	1	0	1	encephalopathy	0		0		1	1	0	0	1	cardiorespiratory arrest	86.3	33.8	11
57	0	75	P	I	100	0	7	1	0	1	0	0	0	0	1	85	1.83	25.3815	1	0	1	1	3	1	4	0	4	8	Nail	0	0	0	0	0	0		0		0		0	0	0	0	0		56	12.2	11
58	1	89	P	D	50	1	5	1	0	1	0	0	0	1	0	90	1.56	36.9822	1	0	1	1	2	0	2	1	3	5	Nail	0	0	0	1	0	0		0		0		0	0	0	0	0		70.7	19	4.4
59	1	88	P	I	75	0	7	1	0	1	0	0	0	1	1	61	1.5	27.1111	1	0	0	1	3	1	2	0	4	6	Nail	0	0	0	1	1	0		0		0		1	1	0	0	1	Urinari sepsis	88.1	36.8	16
60	0	75	P	I	100	0	7	1	1	1	1	0	0	0	1	65	1.8	20.0617	0	0	1	1	3	1	3	1	8	11	Nail	0	0	0	1	0	1	dyspnoea	0		0		0	0	0	0	1	cardiorespiratory arrest	79.6	25.7	16
61	1	85	P	I	40	1	5	1	1	0	0	0	1	1	0	75	1.7	25.9516	1	0	0	1	2	0	3	0	4	7	Nail	0	0	0	0	1	0		1	Wounded spotting	0		0	0	0	0	0		26.9	5.32	6.9
62	1	84	P	I	65	0	6	1	0	0	0	1	1	1	0	65	1.65	23.8751	0	0	0	0	3	1	2	0	4	6	Nail	0	0	0	0	1	0		0		0		0	0	0	0	1	septic shock	48	9.71	6.9
63	1	80	P	D	90	0	6	1	1	1	0	0	0	1	1	53	1.52	22.9398	0	0	1	1	3	1	5	1	4	9	Nail	0	0	0	0	0	0		0		0		1	1	0	0	1	pneumonia and heart failure	73.9	21.1	11
64	1	92	P	D	90	0	6	1	1	1	0	0	0	1	1	60	1.6	23.4375	0	0	0	1	3	1	2	0	5	7	Nail	0	0	0	0	1	0		0		0		0	0	0	0	1	Haemorrhagic stroke	73.9	21.1	6.9
65	1	92	P	I	90	0	9	1	0	1	0	0	1	1	1	60	1.6	23.4375	0	0	0	1	3	1	7	0	5	12	Nail	0	0	0	0	0	0		0		0		0	0	0	0	0		82.9	29.5	11
66	1	82	P	D	90	0	8	1	0	1	1	0	1	1	0	55	1.55	22.8928	0	0	0	0	4	1	1	1	3	4	Nail	0	0	0	0	0	0		0		0		0	0	0	0	0		44	8.63	6.9
67	0	73	P	I	85	0	6	1	0	1	1	0	1	0	0	94	1.75	30.6939	1	1	1	0	3	1	4	0	3	7	Nail	0	0	0	0	0	1	Flutter, COPD decompensation	0		0		0	0	0	0	0		88.1	36.8	6.9
68	1	84	P	I	100	0	10	1	1	1	1	0	1	1	1	55	1.55	22.8928	0	1	1	1	3	1	3	1	4	7	Nail	0	0	0	1	1	1	paralytic ileus	0		0		0	0	0	0	1	respiratory failure	98.8	80.4	16
69	1	94	P	I	95	0	6	1	1	1	0	0	0	1	0	55	1.47	25.4524	1	0	0	1	2	0	1	0	4	5	Nail	0	0	0	1	0	0		0		0		0	0	0	0	1	Haemorrhagic stroke	70.7	19	6.9
70	1	88	P	D	85	0	7	1	0	1	1	0	1	1	0	63	1.6	24.6094	0	0	1	0	3	1	3	1	5	8	Nail	0	0	0	1	0	1	Delirium, anemia and acute renal failure	0		0		0	0	0	0	1	Urinari sepsis	82.1	28.3	6.9
71	1	79	P	D	75	0	3	0	1	1	1	0	0	0	0	62	1.6	24.2187	0	0	1	0	3	1	2	0	7	9	Nail	0	0	0	1	0	1	fever	1	Seroma	0		1	1	0	0	1	Haemorrhagic stroke	76.9	23.3	4.4
72	0	92	P	I	85	0	10	1	0	1	0	1	0	1	0	80	1.7	27.6817	1	0	1	0	3	1	1	0	4	5	Nail	0	0	0	1	1	0		0		0		1	1	0	0	1	cardiorespiratory arrest	86.3	33.8	24
73	1	86	P	I	65	0	11	1	0	1	1	0	1	1	1	77	1.56	31.6404	1	1	1	1	3	1	5	0	5	10	DHS	0	1	0	1	1	0		0		0		0	0	0	0	0		70.7	19	6.9
74	1	94	P	I	55	1	6	1	0	1	0	1	1	1	0	55	1.65	20.202	0	0	1	0	2	0	2	0	5	7	Nail	0	0	0	1	0	1	phlebitis	1	Wounded spotting	0		0	0	0	0	1	respiratory failure	48	9.71	4.4
75	1	83	P	D	50	1	7	1	1	1	0	0	1	1	0	65	1.65	23.8751	0	0	0	0	3	1	4	1	5	9	Nail	0	0	0	1	1	1	Epilepsy	1	surgical wound infection	0		1	1	0	0	1	colon neoplasia, epilepsy	79.6	25.7	16
76	0	92	S	I	50	1	6	1	0	0	0	0	1	1	1	70	1.6	27.3437	1	0	0	1	2	0	2	0	3	5	Nail	1	0	0	0	1	0		0		0		0	0	0	0	1	Haemorrhagic stroke	41.6	2.06	6.9
77	1	81	P	D	70	0	8	1	1	1	0	0	1	1	1	75	1.5	33.3333	1	0	0	1	3	1	3	1	4	7	Nail	0	0	0	1	0	0		0		0		0	0	0	1	1	adenocarcinoma of the rectum	59.9	13.7	11
78	1	95	P	I	60	1	7	1	0	1	0	1	1	1	0	54	1.44	26.0417	1	0	1	0	4	1	5	1	5	10	Nail	0	0	0	1	0	1	Delirium, heart failure decompensation, ileo.	0		0		0	0	0	1	1	congestive heart failure	79.6	25.7	16
79	1	88	P	I	70	0	7	1	1	1	0	0	1	1	1	90	1.55	37.461	1	0	0	1	3	1	4	1	4	8	Nail	0	0	0	0	1	1	heart failure decompensation	0		0		1	1	0	0	1	congestive heart failure	76.9	23.3	11
80	0	86	P	I	55	1	7	1	0	1	0	1	0	1	1	66	1.59	26.1066	1	1	1	1	3	1	3	0	4	7	Nail	0	0	0	1	0	0		0		0		0	0	0	0	0		70.7	19.1	11
81	0	86	P	D	55	1	9	1	1	1	1	1	0	1	1	66	1.59	26.1066	1	1	1	1	3	1	3	1	4	7	Nail	0	0	0	1	0	0		0		0		0	0	0	0	1	urinari infection	76.9	23.3	16
82	1	95	P	D	45	1	7	1	0	0	0	0	0	1	0	55	1.55	22.8928	0	0	0	0	3	1	2	0	15	17	Nail	1	0	0	1	1	1	respiratory infection	0		0		1	1	0	0	1	bronchoaspiration	94.6	54.2	6.9
83	1	91	P	D	95	0	7	1	0	1	0	0	0	1	0	51	1.46	23.9257	0	0	1	0	2	0	2	0	5	7	Nail	0	0	0	0	1	0		0		0		1	1	0	0	1	General decline, pressure ulcers	70.7	19	6.9
84	1	87	P	I	90	0	7	1	0	1	0	0	0	1	0	50	1.55	20.8117	0	1	1	1	3	1	2	0	4	6	Nail	1	0	0	1	1	0		0		0		0	0	0	0	0		89.7	39.9	11
85	1	95	P	D	50	1	6	1	0	0	0	0	0	1	0	45	1.5	20	0	0	1	0	2	0	2	1	4	6	Nail	0	0	0	0	1	0		0		0		0	0	0	0	0		91.5	44.5	4.4
86	1	83	S	I	90	0	5	1	0	1	0	0	0	1	0	85	1.5	37.7778	1	0	0	0	2	0	3	0	3	6	Nail	0	0	0	0	0	0		0		0		0	0	0	0	0		49.5	10.2	2.7
87	1	89	S	I	60	1	4	0	0	1	0	1	1	1	0	52	1.6	20.3125	0	0	1	0	2	0	2	0	10	12	Nail	0	0	0	0	1	1	Delirium	0		0		1	1	0	0	1	pneumonía, bronchoaspiration	57.4	12.9	11
88	1	87	P	D	80	0	9	1	0	1	1	1	0	1	0	90	1.65	33.0579	1	1	0	0	3	1	1	1	4	5	Nail	0	0	0	0	0	0		0		0		0	0	0	0	0		67.3	17.1	6.9
89	1	89	P	D	50	1	5	1	0	1	0	0	0	0	0	80	1.55	33.2986	1	0	0	0	3	1	2	1	4	6	Nail	0	0	0	0	0	1	atrial fibrillation	0		0		0	0	0	0	1		73.9	21.1	2.7
90	1	77	P	I	50	1	7	1	0	1	0	1	0	0	1	90	1.55	37.461	1	1	1	1	4	1	5	0	17	22	Nail	0	0	0	1	1	1	urine infection, anemia	1	Wounded spotting	0		0	0	0	0	0		79.6	25.7	6.9
91	1	80	P	D	40	1	7	1	1	1	0	0	1	0	0	75	1.58	30.0433	1	1	1	0	3	1	2	1	6	8	PHP	0	0	0	0	1	1	phlebitis	0		0		0	0	0	0	0		94.6	54.2	6.9
92	1	80	P	I	40	1	7	1	1	1	0	0	1	0	0	75	1.58	30.0433	1	1	1	0	3	1	2	1	6	8	PHP	0	0	0	0	1	1	phlebitis	0		0		0	0	0	0	0		94.6	54.2	6.9
93	1	87	P	D	100	0	5	1	0	1	0	0	0	1	0	70	1.52	30.2978	1	0	1	0	2	0	2	1	3	5	Nail	0	0	0	0	0	1	Delirium	0		0		0	0	0	0	0		63.6	15.3	4.4
94	0	91	P	D	55	1	9	1	0	1	0	0	1	1	1	78	1.75	25.4694	1	0	0	1	3	1	1	1	4	5	Nail	0	0	0	0	0	0		0		0		0	0	0	0	0		67.3	17.1	16
95	1	89	P	I	60	0	10	1	1	1	1	1	0	1	1	60	1.5	26.6667	1	0	0	1	4	1	2	0	4	6	Nail	0	0	1	0	1	0		0		0		1	1	0	0	1	cardiorespiratory arrest	98.3	76	16
96	0	95	P	I	45	1	7	1	0	1	0	0	0	1	0	78	1.6	30.4687	1	0	1	0	3	1	2	0	4	6	Nail	0	0	0	1	0	0		0		0		1	1	0	0	1	Urinari sepsis	86.3	33.8	24
97	1	90	P	I	60	1	7	1	1	0	0	0	1	1	1	55	1.55	22.8928	0	0	0	1	4	1	2	0	5	7	Nail	0	0	0	0	0	1	Diarrhoea	0		0		1	1	0	0	1	congestive heart failure	70.7	19	11
98	0	95	P	D	45	1	7	1	0	1	1	1	0	1	0	78	1.6	30.4687	1	0	1	0	3	1	0	1	4	4	Nail	0	0	0	0	0	0		0		0		1	1	0	0	0		67.3	17.1	16
99	0	92	P	D	95	0	8	1	0	1	0	0	0	1	0	72	1.78	22.7244	0	0	0	1	3	1	3	1	11	14	Nail	0	0	0	1	0	1	Delirum	0		0		0	0	0	1	1	collapse	82.1	28.3	6.9
100	0	84	P	D	100	0	6	1	1	1	0	0	0	1	1	83	1.69	29.0606	1	0	0	1	3	1	4	1	9	13	Nail	0	0	0	0	1	1	paralytic ileus	0	Wounded spotting	0		1	1	0	0	1	hypovolemic shock	86.3	33.8	6.9
101	1	83	P	I	100	0	5	1	1	1	0	0	0	1	1	56	1.55	23.3091	0	0	0	1	3	1	4	1	7	11	Nail	0	0	0	1	1	1	Delirum	1	Wounded spotting	1	surgical wound lavage	1	0	1	0	1	congestive heart failure	89.7	39.9	6.9
102	1	86	P	D	65	0	5	1	0	1	0	0	0	1	0	101	1.62	38.485	1	0	1	0	3	1	2	0	4	6	Nail	0	1	0	1	1	1	heart failure decompensation	0		0		1	1	0	0	1	Pneumonia	89.7	39.9	6.9
103	1	87	P	D	5	1	5	1	1	1	0	0	0	1	1	75	1.68	26.5731	1	1	0	1	3	1	3	1	3	6	Nail	0	0	0	0	0	0		0		0		1	1	0	0	1	Stroke	73.9	21.1	16
104	1	83	P	I	95	0	6	1	0	1	0	0	1	1	0	88	1.6	34.375	1	0	0		3	1	3	0	3	6	Nail	0	0	0	0	1	0		0		0		0	0	0	0	0		36.4	6.79	4.4
105	1	83	P	I	90	0	6	1	0	1	0	0	0	1	1	88	1.56	36.1604	1	1	0	0	3	1	3	0	4	7	Nail	0	0	0	0	0	0		0		0		0	0	0	0	0		59.9	13.7	4.4
106	0	92	P	D	100	0	9	1	0	1	0	0	0	0	1	74	1.68	26.2188	1	0	1	1	4	1	3	0	7	10	PHP	0	0	0	0	1	1	paralytic ileus, pleural effusion	1	Seroma	0		1	1	0	0	0		92.7	47.8	24
107	1	81	P	D	90	0	9	1	0	1	0	0	0	1	0	60	1.55	24.974	0	1	1	1	3	1	4	0	4	8	Nail	0	0	0	1	0	1	upper gastrointestinal bleeding	0		0		0	0	0	0	0		52	10.9	6.9
108	1	90	P	D	60	1	7	1	0	1	0	0	0	1	0	60	1.6	23.4375	0	0	1	1	2	0	3	1	4	7	Nail	0	0	0	1	0	1	Delirium	0		0		0	1	0	1	1	cardiorespiratory arrest	56	12.02	6.9
109	0	87	P	D	85	0	9	1	0	1	1	0	0	1	1	80	1.6	31.25	1	0	1	1	4	1	4	0	4	8	Nail	0	0	1	0	0	1	Bronchitis	0		0		0	0	0	0	0		79.6	25.7	16
110	1	88	P	I	70	0	8	1	1	1	1	0	1	1	1	60	1.5	26.6667	1	0	1	1	3	1	2	1	7	9	Nail	0	0	0	0	1	1	Anemia, constipation	0		0		0	0	0	0	0		70.7	19	11
111	1	88	P	D	70	0	8	1	1	1	1	0	1	1	1	60	1.5	26.6667	1	0	1	1	3	1	2	1	8	10	Nail	0	0	0	0	1	1	Anemia	0		0		1	0	0	0	0		70.7	19	11
112	1	91	P	D	70	0	7	1	0	1	0	0	1	1	1	50	1.5	22.2222	0	1	1	1	3	1	3	0	3	6	Nail	0	0	0	0	1	0		0		0		0	0	0	0	0		88.1	36.8	11
113	0	85	P	D	100	0	4	0	0	1	0	0	0	1	0	73	1.65	26.8136	1	0	1	0	2	0	2	1	4	6	Nail	0	0	0	0	0	0		0		0		0	0	0	0	0		32.6	6.01	4.4
114	1	84	S	D	90	0	6	1	1	1	0	0	1	1	0	58	1.55	24.1415	0	0	0	1	3	1	2	0	5	7	Nail	1	1	0	0	1	0		0		0		0	0	0	0	1	Sepsis	92.7	47.8	4.4
[truncated: 4 more columns]
